# Supplementary material for: Prenatal Arsenic Exposure and DNA Methylation in Maternal and Umbilical Cord Blood Leukocytes
Source: PubMed Central journal article supplement (PMC3404653; doi:10.1289/ehp.1104173), 2012-03-30
Supplement: ehp.1104173.s001.pdf [file ehp.1104173.s001.pdf]

**Supplementary Material Table 1:** Location of gene promoters and regions that were amplified and the CpG dinucleotide positions within the regions where DNA methylation was quantified.

| Gene       | Chromosome | Promoter     |            | Amplicon     |            | CpGs                                                                                                                                                                        |
|------------|------------|--------------|------------|--------------|------------|-----------------------------------------------------------------------------------------------------------------------------------------------------------------------------|
|            |            | <i>Start</i> | <i>End</i> | <i>Start</i> | <i>End</i> |                                                                                                                                                                             |
| <b>P16</b> | 9          | 21964701     | 21965538   | 21965321     | 21965395   | 21965350 (position 1)<br>21965355 (position 2)<br>21965357 (position 3)<br>21965361 (position 4)<br>21965365 (position 5)<br>21965368 (position 6)<br>21965374 (position 7) |
| <b>P53</b> | 17         | 7531143      | 7531743    | 7531409      | 7531628    | 7531486 (position 1)<br>7531473 (position 2)<br>7531469 (position 3)<br>7531458 (position 4)                                                                                |

**Supplementary Material Table 2: Primers used for DNA methylation analysis**

| ID                                 | Forward Primer<br>(5' to 3')               | Reverse Primer<br>(5' to 3')         | Sequencing Primer<br>(5' to 3') | Sequence analyzed <sup>a</sup>                                                                                      |
|------------------------------------|--------------------------------------------|--------------------------------------|---------------------------------|---------------------------------------------------------------------------------------------------------------------|
| Global methylation analysis        |                                            |                                      |                                 |                                                                                                                     |
| <i>Alu</i>                         | Biotin-<br>TTTTTATTAATAA<br>ATAATAAATT     | CCCAAATAAAATACAAT<br>AA              | AATAACTAAAATTACAAAC             | <u>G</u> / <u>AC</u> / <u>TG</u> / <u>AC</u> / <u>TG</u> / <u>ACCACCA</u>                                           |
| <i>LINE-1</i>                      | TTTTGAGTTAGGTG<br>TGGGATATA                | Biotin-<br>AAAATCAAAAATCCCTT<br>TC   | AGTTAGGTGTGGGATATAGT            | <u>TTC</u> / <u>TGTGGTGC</u> / <u>TGTC</u> / <u>TG</u>                                                              |
| Gene-specific methylation analysis |                                            |                                      |                                 |                                                                                                                     |
| <i>p16</i>                         | AGGGGTTGTTGG<br>TTATTAG                    | Biotin -<br>CTACCTACTCTCCCCCTCT<br>C | GGTTGGTTATTAGAGGGT              | <u>GGGGC</u> / <u>TGGATC</u> / <u>TGC</u> / <u>TGTGC</u> / <u>TGTT</u> / <u>TGGC</u><br><u>/TGGTTGC</u> / <u>TG</u> |
| <i>p53</i>                         | Biotin -<br>TTAGGAGTTTATTT<br>AATTTAGGGAAG | TATCCAACCTTATACCA<br>AAAACCTC        | TCCAAAAACAAATAACTAC<br>TAAACTC  | <u>CG</u> / <u>AAAAACACTTTACG</u> / <u>ATT</u> <u>CG</u> / <u>AAACT</u><br><u>AAAAACG</u> / <u>AT</u> <u>ACTTT</u>  |

<sup>a</sup>Nucleotides at which DNA methylation was measured are underlined

**Supplementary Material Table 3.** Estimates and 95% confidence intervals from general linear regression models that compared DNA methylation (%mC) in umbilical cord blood and maternal blood according to tertiles of total urinary arsenic ( $\mu\text{g/L}$ ). Models are adjusted for maternal BMI and creatinine. Additionally, cord blood models are adjusted for fetal age.

|           |      | Cord Blood |             |         | Maternal Blood |             |         |
|-----------|------|------------|-------------|---------|----------------|-------------|---------|
|           |      | $\beta$    | 95% CI      | p-value | $\beta$        | 95% CI      | p-value |
| LINE-1    | High | 0.95       | -0.09, 1.99 | 0.07    | 0.06           | -1.17, 1.30 | 0.92    |
|           | Med  | 0.32       | -0.53, 1.17 | 0.46    | 0.05           | -0.99, 1.10 | 0.92    |
|           | Low  | Ref.       | -           | -       | Ref.           | -           | -       |
| Alu       | High | 0.14       | -0.30, 0.58 | 0.52    | -0.12          | -0.54, 0.31 | 0.59    |
|           | Med  | 0.02       | -0.34, 0.38 | 0.92    | 0.24           | -0.12, 0.60 | 0.19    |
|           | Low  | Ref.       | -           | -       | Ref.           | -           | -       |
| P16 pos 1 | High | 0.42       | -0.37, 1.21 | 0.29    | 0.27           | -0.64, 1.18 | 0.55    |
|           | Med  | 0.04       | -0.62, 0.69 | 0.91    | -0.01          | -0.79, 0.76 | 0.97    |
|           | Low  | Ref.       | -           | -       | Ref.           | -           | -       |
| P16 pos 2 | High | 0.64       | -0.06, 1.35 | 0.07    | 0.47           | -0.52, 1.46 | 0.5     |
|           | Med  | -0.03      | -0.62, 0.55 | 0.91    | 0.17           | -0.67, 1.02 | 0.74    |
|           | Low  | Ref.       | -           | -       | Ref.           | -           | -       |
| P16 pos 3 | High | 0.22       | -0.21, 0.64 | 0.32    | 0.27           | -0.10, 0.64 | 0.15    |
|           | Med  | -0.02      | -0.38, 0.33 | 0.89    | -0.02          | -0.33, 0.29 | 0.9     |
|           | Low  | Ref.       | -           | -       | Ref.           | -           | -       |
| P16 pos 4 | High | 0.4        | 0.13, 0.92  | 0.14    | 0.38           | -0.22, 0.98 | 0.98    |
|           | Med  | -0.09      | 0.52, 0.35  | 0.7     | 0.35           | -0.15, 0.86 | 0.86    |
|           | Low  | Ref.       | -           | -       | Ref.           | -           | -       |
| P16 pos 5 | High | 0.22       | -0.27, 0.71 | 0.38    | 0.09           | -0.33, 0.52 | 0.66    |
|           | Med  | -0.23      | -0.64, 0.17 | 0.26    | 0.13           | -0.24, 0.49 | 0.49    |
|           | Low  | Ref.       | -           | -       | Ref.           | -           | -       |
| P16 pos 6 | High | 0.16       | -0.26, 0.58 | 0.44    | 0.22           | -0.17, 0.62 | 0.26    |
|           | Med  | -0.23      | -0.58, 0.12 | 0.2     | 0.07           | -0.26, 0.40 | 0.67    |
|           | Low  | Ref.       | -           | -       | Ref.           | -           | -       |
| P16 pos 7 | High | 0.37       | -0.23, 0.97 | 0.22    | 0.55           | -0.70, 1.80 | 0.39    |
|           | Med  | -0.31      | -0.81, 0.19 | 0.22    | 0.41           | -0.66, 1.48 | 0.45    |
|           | Low  | Ref.       | -           | -       | Ref.           | -           | -       |
| P53 pos 1 | High | 0.29       | -0.24, 0.82 | 0.28    | -0.05          | -1.09, 1.00 | 0.93    |
|           | Med  | -0.10      | -0.55, 0.35 | 0.66    | -0.58          | 1.52, 0.36  | 0.22    |
|           | Low  | Ref.       | -           | -       | Ref.           | -           | -       |
| P53 pos 2 | High | -0.32      | -1.96, 1.33 | 0.7     | -0.06          | -1.67, 1.56 | 0.94    |
|           | Med  | 0.39       | -1.78, 1.00 | 0.58    | -0.50          | -0.95, 0.95 | 0.5     |
|           | Low  | Ref.       | -           | -       | Ref.           | -           | -       |
| P53 pos 3 | High | 0.19       | -0.57, 0.96 | 0.62    | -0.09          | -0.70, 0.52 | 0.77    |
|           | Med  | 0.17       | -0.48, 0.82 | 0.6     | -0.11          | -0.66, 0.43 | 0.68    |
|           | Low  | Ref.       | -           | -       | Ref.           | -           | -       |
| p53 pos 4 | High | -0.27      | -1.16, 0.63 | 0.55    | 0.27           | -0.64, 1.17 | 0.56    |
|           | Med  | -0.42      | -1.18, 0.33 | 0.27    | 0.38           | -0.43, 1.19 | 0.36    |
|           | Low  | Ref.       | -           | -       | Ref.           | -           | -       |
